# Supplementary material for: Disease-Specific Autoantibodies Induce Trained Immunity in RA Synovial Tissues and Its Gene Signature Correlates with the Response to Clinical Therapy
Source: Mediators Inflamm. 2020 Oct 6;2020:2109325. doi: 10.1155/2020/2109325 (PMC7558774; doi:10.1155/2020/2109325)
Supplement: Supplementary Materials — Supplementary Table 1: information of patients. Supplementary Table 2: gene lists used in this study. [file 2109325.f1.zip]

Archive with 2 entries (2 files):
- Supplementary Table 2.docx
- supplementary_table1.docx
